# Supplementary material for: Poly(sodium-4-styrene sulfonate) (PSSNa)-assisted transferable flexible, top-contact high-resolution free-standing organic field-effect transistors
Source: Royal Society of Chemistry journal article supplement (doi:10.1039/c5ra21329k), 2015-01-01
Supplement: c5ra21329k1.pdf [file c5ra21329k1.pdf]

**Title:**

**Poly (sodium-4-styrene sulfonate) (PSSNa)-Assisted Transferable Flexible, Top-Contact High-Resolution Free-Standing Organic Field-Effect Transistors**

**Authors:**

Deyang Ji <sup>a</sup>, Ansgar Dominique Donner, <sup>b</sup> Gerhard Wilde, <sup>b</sup> Wenping Hu <sup>\*c</sup>, Harald Fuchs <sup>\*a</sup>

**Affiliations:**

<sup>a</sup> Center for Nanotechnology, Heisenbergstraße 11, 48149 Münster, Germany, Physikalisches Institut, Westfälische Wilhelms-Universität, Wilhelm-Klemm-Straße 10, 48149 Münster, Germany.

<sup>b</sup> Institut für Materialphysik, Wilhelm-Klemm-Straße 10, 48149 Münster, Germany

<sup>c</sup> Beijing National Laboratory for Molecular Sciences, Key Laboratory of Organic Solids, Institute of Chemistry, Chinese Academy of Sciences, Beijing 100190, China.

Correspondence and requests for materials should be addressed to W. H. (huwp@iccas.ac.cn) and H. F. (fuchsh@uni-muenster.de).

## Supporting-1

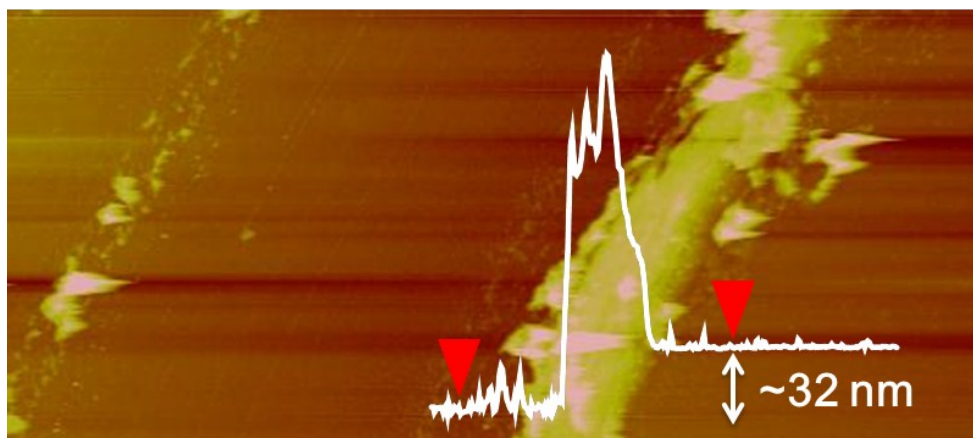

**Fig. S1** AFM image of the thickness of PSSNa.

**Supporting-2**

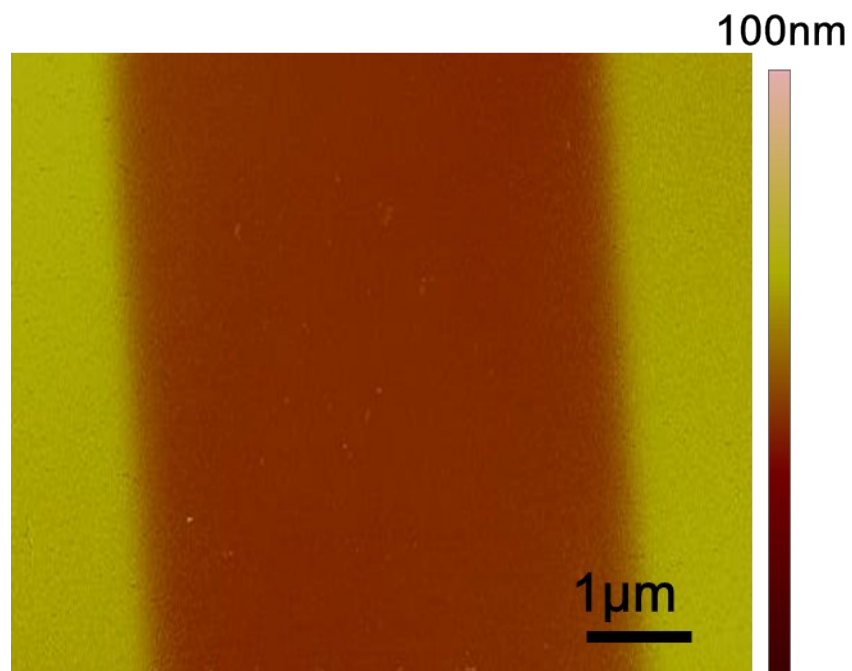

**Fig. S2** AFM image of 5  $\mu\text{m}$  channel.

### Supporting-3

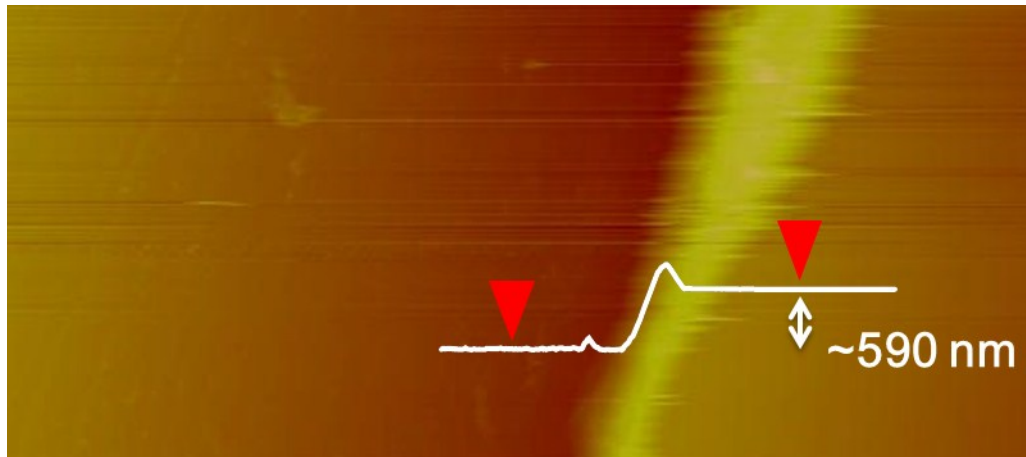

**Fig. S3** AFM image of the thickness of PS.

### Supporting-4

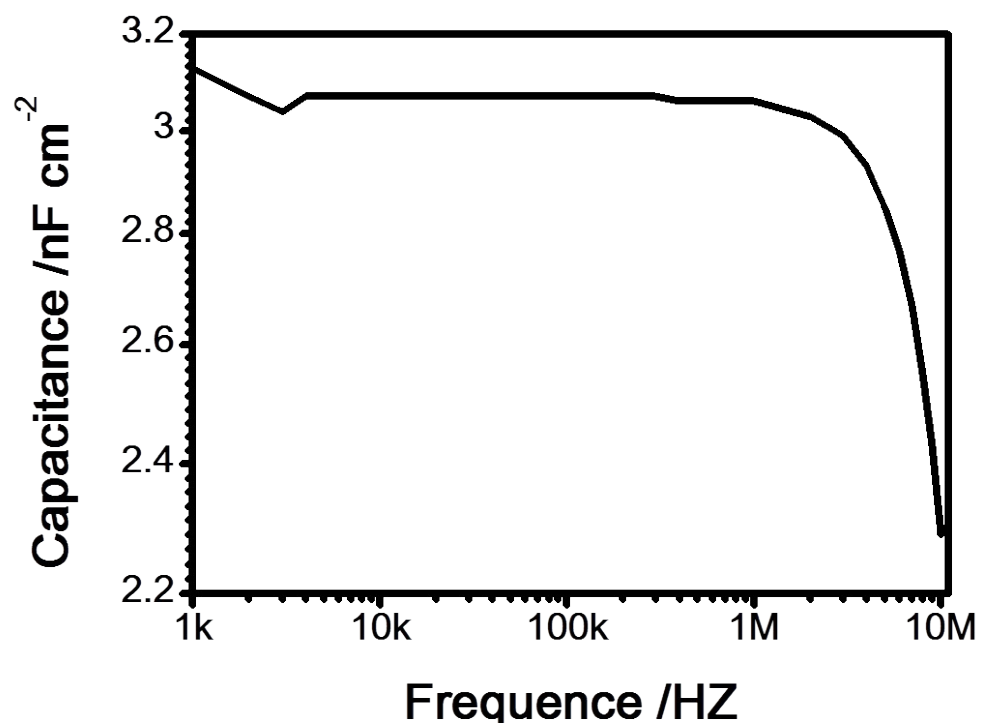

**Fig. S4** Frequency dependence of the specific capacitance of PS.
